# Supplementary material for: Nucleated red blood cells explain most of the association between DNA methylation and gestational age
Source: PubMed Central journal article supplement (PMC9971030; doi:10.1038/s42003-023-04584-w), 2023-02-27
Supplement: 42003_2023_4584_MOESM2_ESM.pdf [file 42003_2023_4584_MOESM2_ESM.pdf]

## Description of Additional Supplementary Files

**File name:** Supplementary Data 1

**Description:** The source data behind Figure 1 in the paper.

**File name:** Supplementary Data 2

**Description:** Detailed information on results from the conventional EWAS model in START. The source data behind Figure 2a, Figure 3a and partly Figure 5 in the paper.

**File name:** Supplementary Data 3

**Description:** Detailed information on results from the CellDMC model in START. The source behind Figure 2b-h, Figure 3 b-h and partly Figure 5 in the paper.

**File name:** Supplementary Data 4

**Description:** Detailed information on results from the CellDMC model in MoBa1.

**File name:** Supplementary Data 5

**Description:** Detailed information on the comparison of CellDMC results between START and MoBa1. The source behind Figure 4 in the paper.

**File name:** Supplementary Data 6

**Description:** Detailed information on the results from the one-stage TCA model in START

**File name:** Supplementary Data 7

**Description:** Detailed information on the results from the two-stage TCA model in START

**File name:** Supplementary Data 8

**Description:** Detailed information on gene annotation of nRBC-specific CpGs associated with gestational age in START.

**File name:** Supplementary Data 9

**Description:** Detailed information on results from the GREAT analysis..

**File name:** Supplementary Data 10

**Description:** Examples of genes annotated to nRBC-specific CpGs associated with gestational age that are relevant for erythropoiesis.
